# Supplementary material for: The role of interleukin-8 (IL-8) and IL-8 receptors in platinum response in high grade serous ovarian carcinoma
Source: PubMed Central journal article supplement (PMC4741626; doi:10.18632/oncotarget.3415), 2015-03-23
Supplement: oncotarget-06-31593-s001.pdf [file oncotarget-06-31593-s001.pdf]

**SUPPLEMENTARY FIGURE**

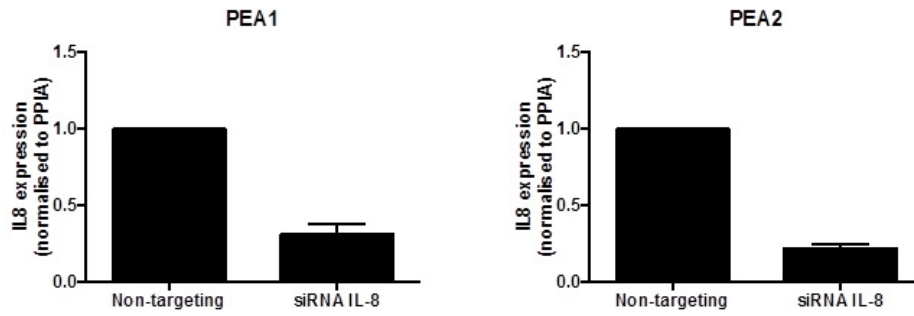

**Supplementary Figure S1: siRNA for IL-8.** Knockdown is confirmed using IL-8 siRNA in comparison to non-targeting control and untreated.
